# Supplementary material for: Antibacterial and Proliferative Effects of NaOH-Coated Titanium, Zirconia, and Ceramic-Reinforced PEEK Dental Composites on Bone Marrow Mesenchymal Stem Cells
Source: MDPI journal article supplement (doi:10.3390/pharmaceutics15010098), 2022-12-28
Supplement: s1 [file s1]

# Antibacterial and proliferative effects of NaOH-coated titanium, zirconia, and ceramic-reinforced PEEK dental composites on bone marrow mesenchymal stem cells

Artiom Lijnev <sup>1</sup>, Jeevithan Elango <sup>1,2,\*</sup>, Vicente M. Gómez-López <sup>3</sup>, Carlos Pérez-Albacete Martínez <sup>4</sup>, José Manuel Granero Marín <sup>5</sup> and José Eduardo Maté Sánchez De Val <sup>1,\*</sup>

<sup>1</sup> Department of Biomaterials Engineering, Faculty of Health Sciences, UCAM-Universidad Católica San Antonio de Murcia, Campus de los Jerónimos 135, Guadalupe, 30107 Murcia, Spain

<sup>2</sup> Center of Molecular Medicine and Diagnostics (COMManD), Department of Biochemistry, Saveetha Dental College and Hospitals, Saveetha Institute of Medical and Technical Sciences, Saveetha University, Chennai 600 077, India

<sup>3</sup> Green and Innovative Technologies for Food, Environment and Bioengineering Research Group (FEnBeT), Faculty of Pharmacy and Nutrition, UCAM-Universidad Católica San Antonio de Murcia, Campus de los Jerónimos 135, Guadalupe, 30107 Murcia, Spain

<sup>4</sup> Oral Surgery and Oral Implantology Department, UCAM-Universidad Católica San Antonio de Murcia, 30107 Murcia, Spain

<sup>5</sup> Department of Implant Dentistry, Faculty of Medicine and Dentistry, UCAM-Universidad Católica San Antonio de Murcia, Campus de los Jerónimos 135, Guadalupe, 30107 Murcia, Spain

\* Correspondence: [srijeevithan@gmail.com](mailto:srijeevithan@gmail.com) or [jelango@ucam.edu](mailto:jelango@ucam.edu) (J.E.); [jemate@ucam.edu](mailto:jemate@ucam.edu) (J.E.M.S.D.V.); Tel.: +34-6-0359-7596 (J.E.)

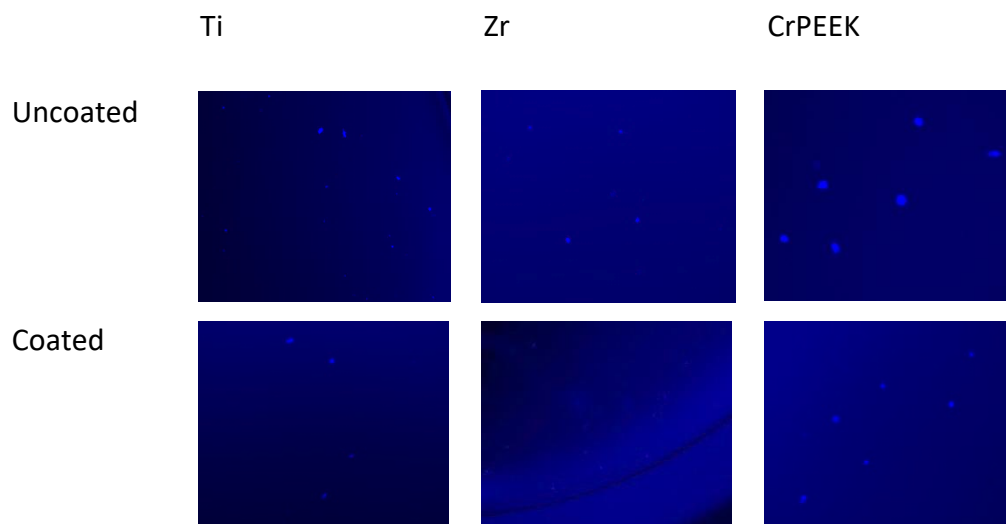

**Supplementary Figure S1:** Fluorescence staining (DAPI) of coated and uncoated specimens. Cells cultured on disks were trypsinized and nuclei were visualized by DAPI stain.
